# Supplementary material for: Correlation of treatment outcome in sanger/RT-qPCR KIT/PDGFRA wild-type metastatic gastrointestinal stromal tumors with next-generation sequencing results: A single-center report
Source: PubMed Central journal article supplement — Oncol Rep. 2022 Jul 28;48(3):167. doi: 10.3892/or.2022.8382 (PMC9351002; doi:10.3892/or.2022.8382), 2022-07-28
Supplement: Supplementary_Data2.pdf [file Supplementary_Data2.pdf]

Table SI. Clinicopathological characteristics of all metastatic *KIT/PDGFR*A positive GIST patients (n=119) and their tumors.

| Clinicopathological characteristic | n (%)      |
|------------------------------------|------------|
| Sex                                |            |
| male                               | 60 (50.4)  |
| female                             | 59 (49.6)  |
| Age, years                         |            |
| median                             | 63.5       |
| range                              | 32-89      |
| ≤60                                | 50 (42.0)  |
| >60                                | 69 (68.0)  |
| Imatinib therapy                   |            |
| yes                                | 116 (97.5) |
| no                                 | 3 (2.5)    |
| Outcome                            |            |
| alive                              | 48 (40.3)  |
| dead                               | 71 (59.7)  |
| Primary tumor location             |            |
| esophagus                          | 5 (4.2)    |
| stomach                            | 44 (37.0)  |
| small intestine                    | 53 (44.5)  |
| rectum                             | 11 (9.2)   |
| other                              | 6 (5.0)    |
| Mitotic rate <sup>a</sup>          |            |
| ≤5                                 | 38 (31.9)  |
| 5.1-10                             | 18 (15.1)  |
| >10                                | 68 (57.1)  |
| unknown                            | 1 (0.8)    |
| Risk classification <sup>b</sup>   |            |
| High                               | 79 (66.4)  |
| Intermediate                       | 23 (19.3)  |
| Low                                | 13 (10.9)  |
| Very low                           | 1 (0.8)    |
| Unknown                            | 3 (2.5)    |

GIST, gastrointestinal stromal tumors; <sup>a</sup>, Mitotic rate counted as the number of mitoses per 5 mm<sup>2</sup>; <sup>b</sup>, Risk group for GIST adapted from Miettinen *et al* (54);
